# Supplementary material for: Outpatient Off-Label Gabapentin Use for Psychiatric Indications Among U.S. Adults, 2011–2016
Source: Atypon-hosted journal article supplement (doi:10.1176/appi.ps.202000338), 2021-05-21
Supplement: appi.ps.202000338.ds001.pdf [file appi.ps.202000338.ds001.pdf]

**Lexicon Plus® drug codes used to determine gabapentin utilization**

| <b>Drugs included and excluded for gabapentin utilization</b> | <b>Drug codes and names</b>                                                                                                                                                                                                  |
|---------------------------------------------------------------|------------------------------------------------------------------------------------------------------------------------------------------------------------------------------------------------------------------------------|
| Drugs included for gabapentin utilization                     | 94114 – gabapentin (generic)<br>94099 – Neurontin® (gabapentin)<br>11078 – Gralise® (gabapentin)                                                                                                                             |
| Drugs excluded for gabapentin utilization                     | 11151 – Horizant® (gabapentin enacarbil)<br>14129 – amitriptyline-baclofen-gabapentin<br>08542 – gabapentin-ketoprofen-lidocaine topical<br>12242 – KBCGL cream (ketamine, baclofen, cyclobenzaprine, gabapentin, lidocaine) |

**ICD-9-CM and ICD-10-CM codes to identify on-label and off-label indications**

| <b>Disease/Condition</b>                             | <b>ICD-9-CM</b>                                   | <b>ICD-10-CM</b>                                                                                                   |
|------------------------------------------------------|---------------------------------------------------|--------------------------------------------------------------------------------------------------------------------|
| <b>On-label indications</b>                          |                                                   |                                                                                                                    |
| Partial onset seizures                               | 345.40, 345.41, 345.70<br>345.50, 345.51          | G40.20x, G40.10, G40.101,<br>G40.109, G40.111, G40.119,<br>G40.209, G40.201                                        |
| Postherpetic neuralgia                               | 053.10, 053.11, 053.12,<br>053.13, 053.14, 053.19 | B02.21, B02.22, B02.23,<br>B02.24, B02.29                                                                          |
| <b>Off-label psychiatric indications of interest</b> |                                                   |                                                                                                                    |
| <b>Anxiety disorders</b>                             |                                                   |                                                                                                                    |
| Anxiety states                                       | 300.01-300.02, 300.10,<br>300.20-300.23, 300.29   | F41.0, F41.1, F44.9, F40.9,<br>F40.01, F40.02, F40.10,<br>F40.8                                                    |
| Other psychiatric disorders                          | 300.00, 300.09, 300.5                             | F41.9, F41.8, F48.8                                                                                                |
| Other developmental disability                       | 313.0 313.21, 323.22                              | F93.8, F93.8                                                                                                       |
| Anxiety disorder in conditions classified elsewhere  | 293.84                                            | F06.4                                                                                                              |
| <b>Depression/depressive disorders</b>               |                                                   |                                                                                                                    |
| Major depressive disorders                           | 296.20-296.26, 296.30-<br>296.36                  | F32.0, F32.1, F32.2, F32.3,<br>F32.4, F32.5, F32.9, F33.0,<br>F33.1, F33.2, F33.3, F33.41,<br>F33.42, F33.8, F33.9 |

|                                                                     |                                                                                                                                                                                                            |                                                                                                                                                                                                                                                     |
|---------------------------------------------------------------------|------------------------------------------------------------------------------------------------------------------------------------------------------------------------------------------------------------|-----------------------------------------------------------------------------------------------------------------------------------------------------------------------------------------------------------------------------------------------------|
| Depressive disorder not elsewhere classified and dysthymic disorder | 311, 300.4                                                                                                                                                                                                 | F32.9, F34.1                                                                                                                                                                                                                                        |
| Minor symptoms, signs and findings                                  | V62.84                                                                                                                                                                                                     | R45.851                                                                                                                                                                                                                                             |
| <b>Bipolar disorders</b>                                            |                                                                                                                                                                                                            |                                                                                                                                                                                                                                                     |
| Bipolar I and II disorders                                          | 296.00-296.06, 296.10-296.16, 296.40-296.46, 296.50-296.56, 296.60-296.66, 296.7, 296.80-296.82, 296.89, 296.90, 296.99                                                                                    | F30.10, F30.11, F30.12, F30.13, F30.2, F30.3, F30.4, F31.10, F31.2, F31.73, F31.74, F31.30, F31.31, F31.32, F31.4, F31.5, F31.75, F31.76, F31.60, F31.61, F31.62, F31.63, F31.64, F31.77, F31.78, F31.9, F30.8, F32.89, F31.81, F39, F34.81, F34.89 |
| <b>Alcohol use disorders</b>                                        |                                                                                                                                                                                                            |                                                                                                                                                                                                                                                     |
| Alcohol dependence and alcohol withdrawal                           | 303.0x, 303.9x, 305.00-305.03, 648.31-648.32, 648.34, 655.51, 648.30, 648.33, 655.50, 655.53 980.0, 760.71, 779.5                                                                                          | F10.229, F10.20, F10.21, F10.10, F10.11, 026.819, 099.89, 099.320, 099.321, 099.322, 099.323, 099.324, 099.325, 035.5XX0, T51.0X1A, T51.0X2A, T51.0X3A, T51.0X4A, T51.91XA, T51.92XA, T51.93XA, T51.94XA P40.3, P96.1, P96.2                        |
| <b>Other psychiatric conditions</b>                                 |                                                                                                                                                                                                            |                                                                                                                                                                                                                                                     |
| Posttraumatic stress disorder (PTSD)                                | 309.81                                                                                                                                                                                                     | F43.10, F43.12                                                                                                                                                                                                                                      |
| Schizophrenia spectrum/psychoses disorders                          | 295.00-295.05, 295.10-295.15, 295.20-295.25, 295.30-295.35, 295.40-295.45, 295.50-295.55, 295.60-295.65, 295.70-295.75, 295.80-295.85, 295.90-295.95, 297.0-297.3, 297.8-297.9, 298.2, 298.3, 298.8, 298.9 | F20.89, F20.0, F20.1, F20.2, F20.3, F20.5, F20.81, F20.89, F20.9, F25.0, F25.1, F25.8, F25.9, F22, F24, F23, F28, F29, F44.89                                                                                                                       |
| Obsessive compulsive disorders (OCD)                                | 300.3                                                                                                                                                                                                      | F42.2, F42.3, F42.8, F42.9                                                                                                                                                                                                                          |



**Specific drugs classes included as central nervous system depressant (CNS-D) prescription drugs**

| Drug Class included as CNS-D            | Generic and trade names included                                                                                                                                                                                                                                                                                                                                                                                                                                                                                                                                                                                                                                                                                                                                                                                         |
|-----------------------------------------|--------------------------------------------------------------------------------------------------------------------------------------------------------------------------------------------------------------------------------------------------------------------------------------------------------------------------------------------------------------------------------------------------------------------------------------------------------------------------------------------------------------------------------------------------------------------------------------------------------------------------------------------------------------------------------------------------------------------------------------------------------------------------------------------------------------------------|
| Antihistamines (first generation)       | Azatadine (Optimine), chlorpheniramine (Chlor-trimeton), diphenhydramine (Benadryl), doxylamine (Unisom), hydroxyzine (Vistaril), promethazine (Phenergan), triprolidine (Actidil)                                                                                                                                                                                                                                                                                                                                                                                                                                                                                                                                                                                                                                       |
| Antidepressants (SNRIs, SSRIs and TCAs) | Citalopram (Celexa), escitalopram (Lexapro), fluoxetine HCL (Sarafem, Seronil, Prodin, Prozac), fluvoxamine maleate (Depromel, Luvox, Luvox CR), paroxetine HCL (Paxil, Paxil CR), paroxetine mesylate (Brisdelle, Pexeva), sertraline HCL (Zoloft); amitriptyline (Elavil), clomipramine (Anafranil), Mirtazapine (Remeron), Duloxetine (Cymbalta), desvenlafaxine (Pristiq, Khedezla), venlafaxine (Effexor), venlafaxine ER (Effexor ER), levomilnacipran (Fetzima)                                                                                                                                                                                                                                                                                                                                                   |
| Antipsychotics                          | Aripirazole (Abilify, Abilify Maintena, Aristada), asenapine (Saphris), cariprazine (Vraylar), chlorpromazine, clozapine (Clozaril), fluphenazine, haloperidol (Haldol), iloperidone (Fanapt), loxapine, lurasidone (Latuda), molindone, olanzapine (Zyprexa, Zyprexa Zydis), olanzapine-fluoxetine (Symbyax), paliperidone (Invega, Invega Sustenna, Invega Trinza), perphenazine, pimavanserin (Nuplazid), quetiapine (Seroquel, Seroquel XR), risperidone (Risperdal, Risperdal Consta), thioridazine, thiothixne (Navane), trifluoperazine, ziprasidone (Geodon)                                                                                                                                                                                                                                                     |
| Benzodiazepines                         | Alprazolam (Xanax, Xanax XR), chlordiazepoxide (Librium, Librax), clobazam (Onfi), clonazepam (Klonopin), clorazepate (Gen-Xene, Tranxene), diazepam (Diastat, Diastat Acudial, Valium), estazolam, flurazepam, lorazepam (Ativan), oxazepam, quazepam (Doral), teazepam (Restoril), triazolam (Halcion)                                                                                                                                                                                                                                                                                                                                                                                                                                                                                                                 |
| Sedatives and hypnotics                 | Butabarbital sodum (Butisol), eszopiclone (Lunesta), pentobarbital (Nembutal), ramelteon (Rozerem), secobarbital sodium (Seconal sodium), suvorexant (Belsomra), zaleplon (Sonata), zolpidem (Ambien, Ambien CR, Edluar, Intermezzo, Zolpimist)                                                                                                                                                                                                                                                                                                                                                                                                                                                                                                                                                                          |
| Opioids and opioid-combination products | apomoprphine, atropine-morphine, bupivacaine-morphine, buprenorphine (Buprenex, Butrans), butorphanol (Stadol), codeine (Fioricet, Fiorinal), acetaminophen-codeine (apap w/ codeine, Capital w/ codeine, Empracet w/ codeine, Phenaphen w/ codine, Tylenol w/ codeine, Panadol w/ codeine, hydrocodone bitartrate w/ apap), dihydrocodeine (Synalgos-DC), fentanyl (Abstral, Actiq, Duragesic, Fentora, Onsolis, Subsys, Sublimaze), fentanyl-droperidol, hydrocodone (Hysingla, Lortab, Norco, Vicodin, Vicoprofen, Zohydro), hydrocodone-acetaminophen (Panlor), hydrocodone-aspirin, hydrocodone- chlorpheniramine, hydrocodone-ibuprofen, hydrocodone-homatropine, hydromorphone (Dilaudid, Exalgo, Palladone), hydromorphone-bupivicane, levorphanol (Levo-Dromoran), meperidine (Demerol, Meperitab), meperidine- |

|                           |                                                                                                                                                                                                                                                                                                                                                                                                                                                                                                                                                                                                                                                                                   |
|---------------------------|-----------------------------------------------------------------------------------------------------------------------------------------------------------------------------------------------------------------------------------------------------------------------------------------------------------------------------------------------------------------------------------------------------------------------------------------------------------------------------------------------------------------------------------------------------------------------------------------------------------------------------------------------------------------------------------|
|                           | acetaminophen (Demerol-apap), meperidine-promethazine, methadone (Dolophine), morphine/morphine ER (Avinza, Kadian, MS Contin, Oramorph, Roxanol), nalbuphine (Nubain), opium, opium-belladonna, oxycodone (Dazidox, Oxycontin, Roxicodone, Oxy IR, Oxyfast), oxycodone-acetaminophen (Magnacet, Narvox, Oxycet, Percocet), oxymorphone (Numorphan, Opana, Opana ER), pentazocine (Talwin), pentazocine-acetaminophen (Talacen), propoxyphene, propoxyphene-acetaminophen, remifentanil (Ultiva), sufentanil (Sufenta), tapentadol (Nucynta, Nucynta ER), tramadol (Conzip, Ryzolt, Ultracet, Ultram, Ultram ER), tramadol-acetaminophen, tramadol-aspirin, tramadol-carisoprodol |
| Skeletal muscle relaxants | Baclofen (Lioresal), carisoprodol (Soma), carisoprodol-aspirin, carisoprodol-aspirin-codeine, chlorzoxazone, chlorzoxazone-acetaminophen, cyclobenzaprine (Amrix, Flexeril), dantrolene (Dantrium), metaxalone (Skelaxin), methocarbamol (Robaxin, Robaxin-750), orphenadrine (Norflex), tizanidine (Zanaflex)                                                                                                                                                                                                                                                                                                                                                                    |

**Sensitivity analysis for proportions of on-label and off-label gabapentin utilization including all available diagnosis and medication variables, 2011-2016**

|                                                                     | 2011 <sup>a</sup> |      | 2012 <sup>b</sup> |      | 2013 <sup>c</sup> |      | 2014 <sup>d</sup> |      | 2015 <sup>e</sup> |      | 2016 <sup>f</sup> |      | Total |      |
|---------------------------------------------------------------------|-------------------|------|-------------------|------|-------------------|------|-------------------|------|-------------------|------|-------------------|------|-------|------|
| Characteristic                                                      | N                 | %    | N                 | %    | N                 | %    | N                 | %    | N                 | %    | N                 | %    | N     | %    |
| <b>Gabapentin visits</b>                                            | 626               | 9.7  | 1,469             | 22.8 | 1,393             | 21.6 | 1,591             | 24.7 | 953               | 14.8 | 412               | 6.4  | 6,444 | 100  |
| <b>Weighted visits<sup>g</sup><br/>(in millions)</b>                | 16.2              | 9.7  | 16.8              | 22.8 | 23.9              | 21.6 | 29.7              | 24.7 | 34.8              | 14.8 | 28.7              | 6.4  | 150.2 | 100  |
| <b>Proportion of on-label and off-label utilization<sup>h</sup></b> |                   |      |                   |      |                   |      |                   |      |                   |      |                   |      |       |      |
| Any on-label indications                                            | ---               | 0.8  | ---               | 0.7  | ---               | 0.4  | ---               | 0.4  | ---               | 0.6  | ---               | 1.2  | 40    | 0.6  |
| Any off-label indications                                           | 621               | 99.2 | 1,458             | 99.3 | 1,387             | 99.6 | 1,584             | 99.6 | 947               | 99.4 | 407               | 98.8 | 6,404 | 99.4 |

a. No changes from main analysis; 8 medication variables and 3 diagnosis variables included

b. 10 medication variables and 3 diagnosis variables included

c. 10 medication variables and 3 diagnosis variables included

d. 30 medication variables and 5 diagnosis variables included

e. 30 medication variables and 5 diagnosis variables included

f. 30 medication variables and 5 diagnosis variables included

g. Nationally representative weighted estimates

h. Cells with low sample size are suppressed per NAMCS reporting requirements

**Frequency of other provider specialties for U.S. ambulatory care visits involving on-label and off-label gabapentin by year, 2011-2016**

|                                                      | 2011 |      | 2012  |      | 2013  |      | 2014  |      | 2015 |      | 2016 |      |
|------------------------------------------------------|------|------|-------|------|-------|------|-------|------|------|------|------|------|
| Characteristic                                       | N    | %    | N     | %    | N     | %    | N     | %    | N    | %    | N    | %    |
| <b>Gabapentin visits</b>                             | 626  | 10.9 | 1,382 | 24.1 | 1,275 | 22.2 | 1,320 | 23.0 | 788  | 13.7 | 341  | 6.0  |
| <b>Weighted visits<sup>a</sup><br/>(in millions)</b> | 16.2 | 10.9 | 15.8  | 10.9 | 22.0  | 22.2 | 24.4  | 23.0 | 27.4 | 13.7 | 23.8 | 6.0  |
| <b>Provider specialty</b>                            |      |      |       |      |       |      |       |      |      |      |      |      |
| Primary care <sup>b</sup>                            | 210  | 33.6 | 500   | 36.2 | 462   | 36.2 | 517   | 39.2 | 178  | 22.6 | 132  | 38.7 |
| Neurology                                            | 171  | 27.2 | 138   | 10.0 | 131   | 10.3 | 75    | 5.7  | 139  | 17.6 | 48   | 14.1 |
| Psychiatry                                           | 38   | 6.1  | 77    | 5.6  | 58    | 4.6  | 48    | 3.6  | 46   | 5.8  | 17   | 5.0  |
| Other specialty                                      | 207  | 33.1 | 667   | 48.3 | 624   | 48.9 | 680   | 51.5 | 425  | 53.9 | 144  | 42.2 |
| <b>Other provider specialty</b>                      |      |      |       |      |       |      |       |      |      |      |      |      |
| General surgery                                      | 13   | 2.1  | 26    | 1.9  | 27    | 2.1  | 22    | 1.7  | 27   | 2.4  | 13   | 3.8  |
| Orthopedic surgery                                   | 12   | 1.9  | 57    | 4.1  | 92    | 7.2  | 76    | 5.8  | 88   | 11.2 | 18   | 5.3  |
| Cardiovascular diseases                              | 31   | 5.0  | 78    | 5.6  | 70    | 5.5  | 77    | 5.8  | 54   | 6.9  | 17   | 5.0  |
| Dermatology                                          | 3    | 0.5  | 8     | 0.6  | 5     | 0.4  | 12    | 0.9  | 35   | 4.4  | 9    | 2.6  |
| Urology                                              | 18   | 2.9  | 19    | 1.4  | 15    | 1.2  | 29    | 2.2  | 67   | 8.5  | 13   | 3.8  |
| Ophthalmology                                        | 17   | 2.7  | 21    | 1.5  | 37    | 2.9  | 26    | 2.0  | 60   | 7.6  | 22   | 6.2  |
| Otolaryngology                                       | 14   | 2.2  | 15    | 1.1  | 12    | 0.9  | 14    | 1.1  | 39   | 5.0  | 12   | 3.5  |
| Oncology (2011 only)                                 | 37   | 5.9  | ---   | ---  | ---   | ---  | ---   | ---  | ---  | ---  | ---  | ---  |
| All others                                           | 62   | 9.9  | 443   | 32.1 | 366   | 28.7 | 424   | 32.1 | 55   | 7.0  | 41   | 12.0 |

a. Nationally representative weighted estimates

b. Primary care physicians are defined by NAMCS as general and family practice, internal medicine, pediatrics, obstetrics and gynecology
